# Supplementary material for: Bayesian joint ordinal and survival modeling for breast cancer risk assessment
Source: PubMed Central journal article supplement — Stat Med. 2016 Aug 14;35(28):5267–82. doi: 10.1002/sim.7065 (PMC5129536; doi:10.1002/sim.7065), 2016-08-14
Supplement: SIM-35-5267-s001.pdf [file SIM-35-5267-s001.pdf]

Received XXXX

(www.interscience.wiley.com) DOI: 10.1002/sim.0000

# Supplementary material for “Bayesian joint ordinal and survival modeling for breast cancer risk assessment”

C. Armero<sup>(1)</sup>, C. Forné<sup>(2,3)</sup>, M. Rué<sup>(2,4)</sup>, A. Forte<sup>(1)</sup>, H. Perpiñán<sup>(1,5)</sup>, G. Gómez<sup>(6)</sup>, and M. Baré<sup>(4,7)</sup>

In this supplemental document, we provide additional data analysis results and the BUGS code of the proposed model for studying breast cancer diagnosis with regard to longitudinal breast density measurement.

## BI-RADS and age

**Table A1.** Posterior expectation of the probability associated to each BI-RADS category with respect to age.

| BI-RADS  | Age (years) |       |       |       |       |
|----------|-------------|-------|-------|-------|-------|
|          | 50          | 55    | 60    | 65    | 70    |
| <i>a</i> | 0.150       | 0.168 | 0.191 | 0.214 | 0.239 |
| <i>b</i> | 0.526       | 0.538 | 0.541 | 0.545 | 0.545 |
| <i>c</i> | 0.166       | 0.157 | 0.147 | 0.136 | 0.125 |
| <i>d</i> | 0.158       | 0.137 | 0.121 | 0.106 | 0.092 |

<sup>(1)</sup> Department of Statistics and Operational Research, Universitat de València, Doctor Moliner, 50, 46100-Burjassot, Spain.

<sup>(2)</sup> Department of Basic Medical Sciences, Universitat de Lleida-IRBLleida, Avda. Rovira Roure, 80, 25198-Lleida, Spain.

<sup>(3)</sup> Oblikue Consulting, Barcelona, Spain.

<sup>(4)</sup> Health Services Research Network in Chronic Diseases (REDISSEC).

<sup>(5)</sup> Fundación para el Fomento de la Investigación Sanitaria y Biomédica (FISABIO), Generalitat Valenciana, Spain.

<sup>(6)</sup> Department of Statistics and Operations Research, Universitat Politècnica de Catalunya, Barcelona, Spain.

<sup>(7)</sup> Clinical Epidemiology and Cancer Screening. Corporació Sanitària Parc Taulí-UAB, Sabadell, Parc Taulí s/n, 08208, Sabadell, Spain.

Cumulative incidence

In Figure A1, the dashed line shows the cumulative incidence calculated using the Kaplan-Meier approach without accounting for competing risk events. The solid line shows the cumulative incidence, after adjusting for competing risk. The dotted line shows the cumulative incidence of the death occurring prior to the breast cancer diagnosis.

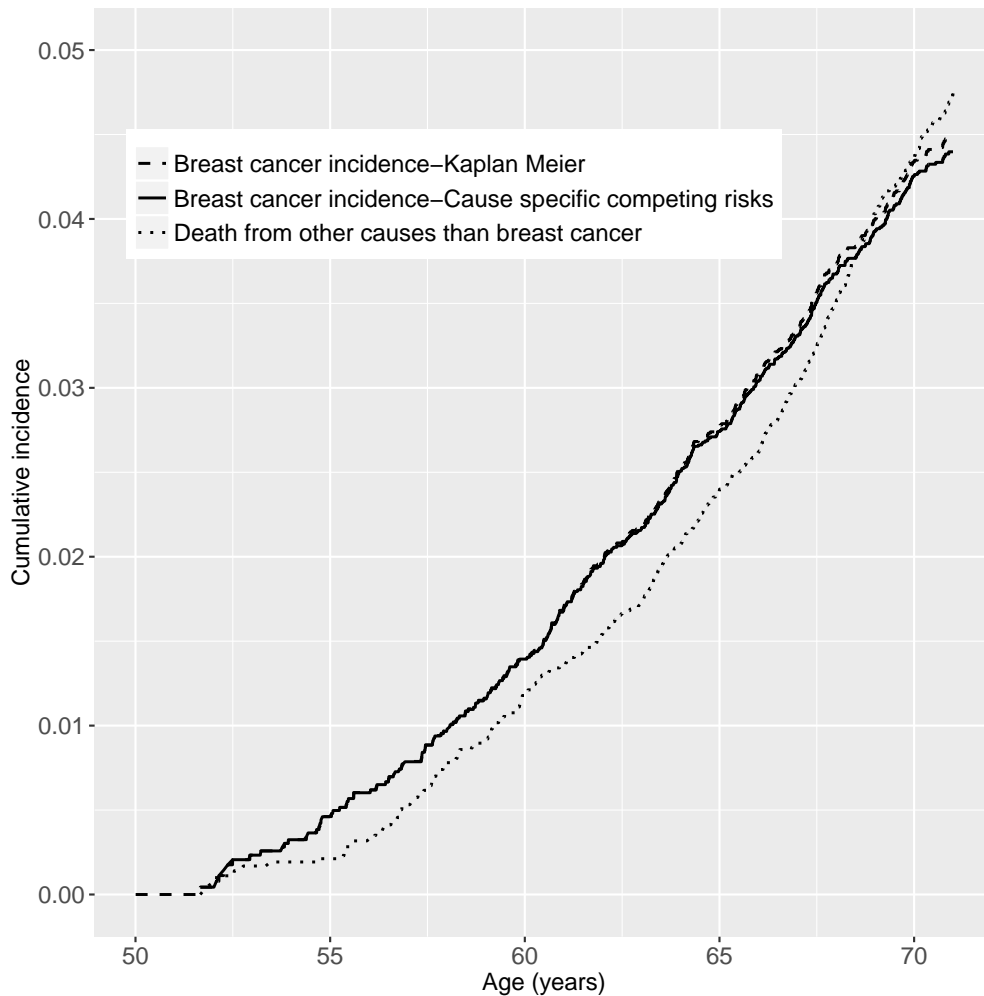

Figure A1. The estimated cumulative incidence of breast cancer using the Kaplan-Meier approach and the competing risks approach.

JAGS code for the proposed model

```

model{
for(i in 1:N){
  for(j in 1:K[i]){
    y[i,j] ~ dcat(p[i,j,1:4]) #1
    p[i,j,1] <- 1-q[i,j,1]
    p[i,j,2] <- q[i,j,1]-q[i,j,2]
    p[i,j,3] <- q[i,j,2]-q[i,j,3]
    p[i,j,4] <- q[i,j,3]
  }
}

```

```

logit(q[i,j,1]) <- location[i,j]-gamma1
logit(q[i,j,2]) <- location[i,j]
logit(q[i,j,3]) <- location[i,j]-gamma3
location[i,j] <- beta0 + b0[i] + beta1*time[i,Proj[i,j]]
                + b1[i]*time[i,Proj[i,j]]
}#times[i,] a grid of times for individual i and times[i,Proj[i,j]]
is the observed time of individual i at time j

#0nes' trick for a not implemented likelihood in BUGS
ones[i] ~ dbern(prob[i]) #2
prob[i] <- L[i]/C

## Likelihood for survival data - event=1 if event, and 0 if censoring
L[i] <- (pow(f[i],event[i])*pow(S[i],1-event[i]))/(S0[i])

## Hazard for individual i at each time point of the grid time[i,]
for(j in 1:J[i]){
  h[i,j] <- (lambda*pow(time[i,j], (lambda-1))) * exp(eta[1] + eta[2]*numrel[i]
              + eta[3]*brstproc[i] + alpha*(beta0 + b0[i] + (beta1 + b1[i])*time[i,j]))
}

## Cumulative hazard H[t] = int_0^t (h[u] du) using GAUSS-LEGENDRE polynomials
and evaluated at 12 different (n.end) points indicated by Proj.aux
for(j in 1:n.end){ #3
  Aux[i,j] <- ((time[i,Proj.aux[j+1]]-time[i,Proj.aux[j]])/2)
              *inprod(wk.int, h[i, (Proj.aux[j]+1):(Proj.aux[j]+5)])
              #wk.int Gauss-Legendre weights
  H[i,j] <- sum(Aux[i,1:j])
}

## Survival probability for individual i at their final time
S[i] <- exp(-H[i,n.end])
## Survival probability for individual i at their entry time
S0[i] <- exp(-H[i,n.ini])

## Density function
f[i] <- h[i,J[i]]*S[i]

b0[i] ~ dnorm(0, tau0)
b1[i] ~ dnorm(0, tau1)
}
C <- 10000

#Prior distributions for the survival process
for(i in 1:3){ eta[i] ~ dnorm(0.0, 0.0001) }

```

```
alpha ~ dnorm(0.0, 0.0001)
lambda ~ dgamma(1, 1)

#Prior distributions for the longitudinal process
beta0 ~ dnorm(0.0, 0.0001)
beta1 ~ dnorm(0.0, 0.0001)
gamma1 ~ dnorm(-1.0986, 0.001)I(,0)
gamma3 ~ dnorm(1.0986, 0.001)I(0,)
tau0 <- pow(sig0, -2)
sig0 ~ dunif(0, 100)
tau1 <- pow(sig1, -2)
sig1 ~ dunif(0, 100)
}
```

1. Specification of the latent variable
2. One's trick for the Survival likelihood to incorporate left truncation.
3. Code for the numerical integration for  $H(t)$  using Gauss-Legendre polynomials and evaluated at different time points
